# Supplementary material for: Fast local fragment chaining using sum-of-pair gap costs
Source: Springer Nature journal article supplement (doi:10.1186/1748-7188-6-4), 2011-03-18

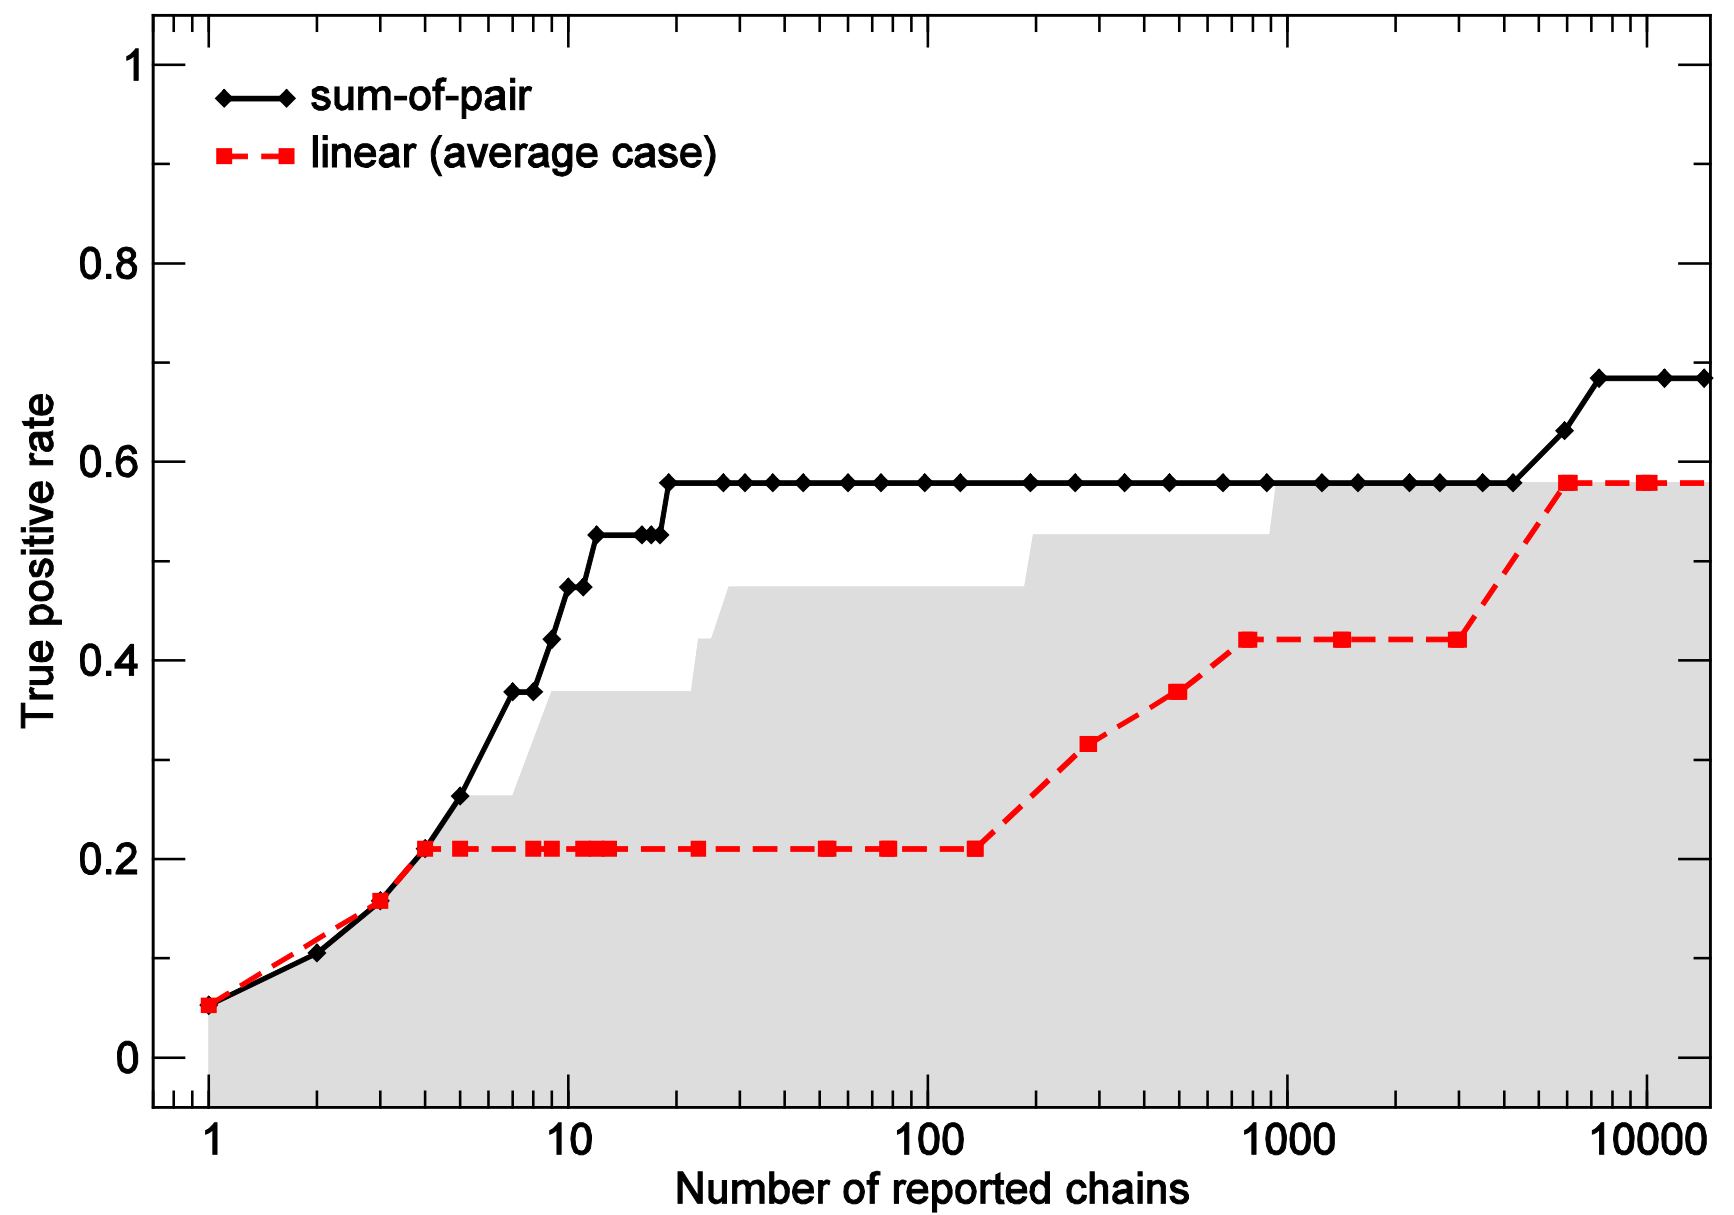

Supplement: 13015_2010_117_MOESM9_ESM.pdf [file 13015_2010_117_MOESM9_ESM.pdf]
